## Correction

**Correction: Loss of RAB1B promotes triple-negative breast cancer metastasis by activating TGF- $\beta$ /SMAD signaling****Hong-Lin Jiang<sup>1,2,\*</sup>, He-Fen Sun<sup>1,2,\*</sup>, Shui-Ping Gao<sup>1,2</sup>, Liang-Dong Li<sup>1,2</sup>, Xin Hu<sup>1</sup>, Jiong Wu<sup>1,2</sup> and Wei Jin<sup>1,2</sup>**

<sup>1</sup>Department of Breast Surgery, Key Laboratory of Breast Cancer in Shanghai, Collaborative Innovation Center of Cancer Medicine, Fudan University Shanghai Cancer Center, Shanghai, China

<sup>2</sup>Department of Oncology, Shanghai Medical College, Fudan University, Shanghai, China

\*These authors have contributed equally to this work

**Published:**

**Copyright:** © 2020 Jiang et al. This is an open access article distributed under the terms of the [Creative Commons Attribution License](#) (CC BY 3.0), which permits unrestricted use, distribution, and reproduction in any medium, provided the original author and source are credited.

**This article has been corrected:** Due to errors during figure assembly, several accidental image duplications were made. In Figure 2C, the 2nd row, 3rd panel image is a partial duplicate of the 1st panel image of Figure 2E. In Figure 3C, the 3rd row, 2nd panel image duplicates the 3rd row, 2nd panel image in Figure 3B. In Figure 5A, the 2nd row, 2nd panel image duplicates the 2nd row, 6th panel image of the same figure. In addition, the wrong mice pictures were used for the BLI images in row 1, panels 1 and 2, in Figure 5A. The correct versions of Figures 2C, 3C, and 5A appear below. The authors declare that these corrections do not change the results or conclusions of this paper.

Original article: Oncotarget. 2015; 6:16352–16365. <https://doi.org/10.18632/oncotarget.3877>

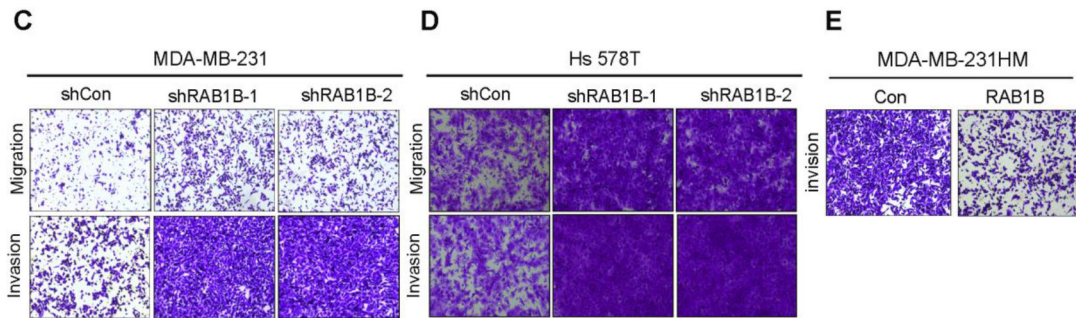

**Figure 2: Low RAB1B expression promotes breast cancer metastasis *in vitro*.** (C–E) The migration and invasion ability of each cell line was evaluated by transwell assay *in vitro*. The left panels show photos of representative fields (100× magnification) of invasive cells, and the right panel shows histograms of the results. The statistical analysis was performed using Student's *t*-test ( $n = 3$ ). The error bars represent the SD, \*\*\* $P < 0.001$ .

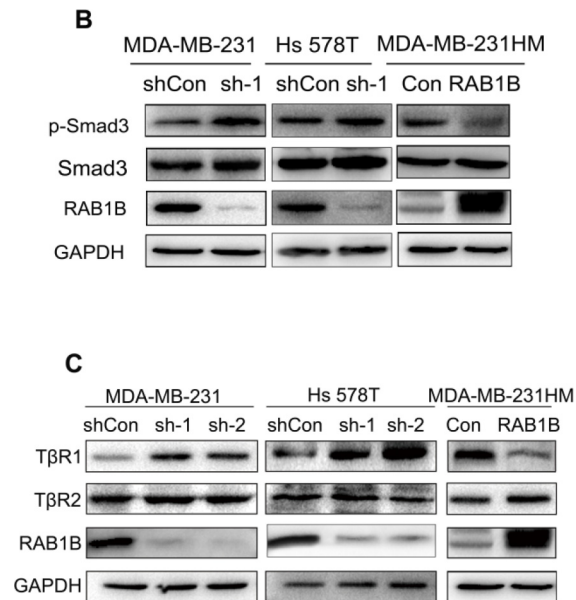

**Figure 3: Loss of RAB1B activates TGF- $\beta$ /SMAD signaling by suppressing T $\beta$ R1 degradation.** (B) Immunoblot analysis of p-Smad3 and Smad3 expression in RAB1B knockdown and overexpressing cells. (C) Western blot analysis of T $\beta$ R1 and T $\beta$ R2 expression in RAB1B knockdown and overexpressing cells.

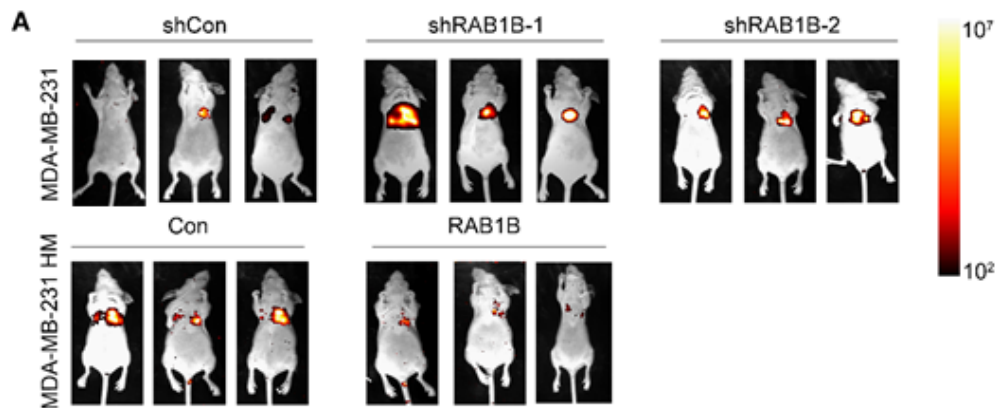

**Figure 5: Low RAB1B expression promotes breast cancer metastasis *in vivo* and correlates with poor patient prognosis.** (A) Representative BLI images of nude mice at the sixth week after tail vein injection of RAB1B downregulated MDA-MB-231 cells and RAB1B overexpressing MDA-MB-231HM cells.
